# Supplementary material for: The role of health determinants in the influenza vaccination uptake among older adults (65+): a scope review
Source: Aging Clin Exp Res. 2021 Feb 15;33(8):2123–32. doi: 10.1007/s40520-021-01793-3 (PMC7882864; doi:10.1007/s40520-021-01793-3)
Supplement: Supplementary file 2 — Supplementary file2 (PDF 147 KB) [file 40520_2021_1793_MOESM2_ESM.pdf]

# The role of health determinants in the influenza vaccination uptake among older adults (65+): a scope review

Aging Clinical and Experimental Research

Regina Roller-Wirnsberger (Corresponding Author, Medical University of Graz, Department of Internal Medicine), Sonja Lindner, Lea Kolosovski, Elisabeth Platzter, Peter Dovjak, Holger Flick, Chariklia Tziraki and Maddalena Illario

**Supplementary Table 2: Analysed factors influencing influenza vaccination uptake in adults > 65 years according to literature search**

[illegible]



|              | Intermediary Determinants           |        |               |                             |                          |                        |                              |                |                   |      |                               |                |                                 |                                     |                 |             |                            |                       |                                                                     |         | Structural Determinants |         |                |                  |                                      |               |                                               |                    |                                                          |                           |                 |                                     |            |                             |             |                    |                  |                        |                           |                       |          |
|--------------|-------------------------------------|--------|---------------|-----------------------------|--------------------------|------------------------|------------------------------|----------------|-------------------|------|-------------------------------|----------------|---------------------------------|-------------------------------------|-----------------|-------------|----------------------------|-----------------------|---------------------------------------------------------------------|---------|-------------------------|---------|----------------|------------------|--------------------------------------|---------------|-----------------------------------------------|--------------------|----------------------------------------------------------|---------------------------|-----------------|-------------------------------------|------------|-----------------------------|-------------|--------------------|------------------|------------------------|---------------------------|-----------------------|----------|
|              | Age, sex and constitutional factors |        |               |                             |                          |                        | Individual lifestyle factors |                |                   |      | Social and community networks |                |                                 | Self-reported barriers/facilitators |                 |             |                            |                       | Living and working conditions, socioeconomic and healthcare factors |         |                         |         |                |                  |                                      |               |                                               |                    | General political, cultural and environmental conditions |                           |                 |                                     |            |                             |             |                    |                  |                        |                           |                       |          |
|              |                                     |        |               |                             |                          |                        |                              |                |                   |      |                               |                |                                 |                                     |                 |             |                            |                       |                                                                     |         |                         |         |                |                  |                                      |               |                                               |                    |                                                          |                           |                 |                                     |            |                             |             |                    |                  |                        |                           |                       |          |
|              | Age                                 | Gender | Health status | Presence of chronic disease | Type of chronic diseases | Other health parameter | Smoking status               | Alcohol intake | Physical activity | Diet | Self-care                     | Marital status | Household arrangements/Children | Influence of family/friend          | Social networks | Experiences | Trust/Belief in efficiency | Attitudes and beliefs | Not needing/perceived susceptibility                                | No time | Forgot                  | Allergy | Didn't want it | Residential area | Healthcare utilization/accessibility | Level of care | Recommendations from Healthcare Professionals | Characteristics GP | Vaccinated before                                        | Price, Free of charge, IV | Education level | Knowledge about influenza (vaccine) | Employment | Income/Socioeconomic status | Deprivation | Characteristics GP | Health insurance | Cultural ethnic groups | Recommended by government | Other policy elements | Reminder |
| Doherty 2016 |                                     |        |               |                             |                          |                        |                              |                |                   |      |                               |                |                                 |                                     |                 |             |                            |                       |                                                                     |         |                         |         |                |                  |                                      |               |                                               |                    |                                                          |                           |                 |                                     |            |                             |             |                    |                  |                        |                           |                       |          |
| Kan 2018     |                                     |        |               |                             |                          |                        |                              |                |                   |      |                               |                |                                 |                                     |                 |             |                            |                       |                                                                     |         |                         |         |                |                  |                                      |               |                                               |                    |                                                          |                           |                 |                                     |            |                             |             |                    |                  |                        |                           |                       |          |
| Thomas 2018  |                                     |        |               |                             |                          |                        |                              |                |                   |      |                               |                |                                 |                                     |                 |             |                            |                       |                                                                     |         |                         |         |                |                  |                                      |               |                                               |                    |                                                          |                           |                 |                                     |            |                             |             |                    |                  |                        |                           |                       |          |

**Supplementary Table 2.** Supplementary Table 2 shows the social determinants analysed in the papers included in this scope review on vaccination hesitancy and factors affecting seasonal influenza vaccination uptake among older people. Coloured boxes indicate that the respective determinant has been analysed in the study. Grey boxes point out those determinants that have not been considered within the article concerned. As may be seen from the table there is strong evidence around individual person-related factors that influence vaccination behaviour. Only few publications which were found due to the search strategy applied build evidence for system based-factors or political interventions to improve VU.
